# Supplementary material
Source: PubMed Central journal article supplement (PMC2871492)
Supplement: supp_M109.048785_jbc.M109.048785-1.pdf [file supp_M109.048785_jbc.M109.048785-1.pdf]

## Supplementary TABLE 1.

### Luciferase mRNA in cytoplasm

The average percentages of NFAT-pGL3 or NFκB-pTransLucent luciferase mRNA in cytoplasm of transduced K562 cells from 3 independent experiments are shown  $\pm$  standard deviations. The *P* value was obtained by comparing to control using a two-tailed distribution t-test.

|             | NFAT-pGL3 Luciferase  |                | NFκB-pTransLucent Luciferase |                |
|-------------|-----------------------|----------------|------------------------------|----------------|
|             | mRNA in Cytoplasm (%) | <i>P</i> value | mRNA in Cytoplasm (%)        | <i>P</i> value |
| Control     | 87.49 $\pm$ 1.72      |                | 90.99 $\pm$ 1.68             |                |
| NUP98-HOXA9 | 88.04 $\pm$ 1.83      | 0.727          | 89.29 $\pm$ 1.17             | 0.223          |
| NUP98-DDX10 | 86.75 $\pm$ 4.18      | 0.791          | 88.48 $\pm$ 1.41             | 0.118          |

### Supplementary Experimental Procedures

*Quantitation of luciferase mRNA* — K562 cells were transfected by electroporation as described for *Luciferase reporter assays* in Experimental Procedures but without pRL-TK. Cytoplasmic and nuclear RNA was prepared from each transfected sample after 48 h culture using Cytoplasmic & Nuclear RNA Purification kit and RNase-free DNase I kit (Norgen Biotek Corp., Thorold, Canada). For quantitation of NFAT-pGL3 and NFκB-pTransLucent mRNA by quantitative PCR (qPCR), template cDNA was synthesized using SuperScript III First-strand Synthesis System for RT-PCR (Invitrogen). qPCR was carried out using B-R SYBR Green Supermix (Quanta Biosciences Inc., Gaithersburg, MD) in StepOnePlus Real-Time PCR System (Applied Biosystems, Foster City, CA) with the following primer sets: 5'-AAGAAGGGCGGAAAGATCG-3' with oligo(dT)<sub>30</sub> for NFAT-pGL3; 5'-TTACCGGAAAACCTCGACGC-3' with oligo(dT)<sub>30</sub> for NFκB-pTransLucent. The amount of transcript in the cytoplasm and nucleus was determined based on a standard curve specific for each luciferase and normalized to the amount of glyceraldehydes phosphate dehydrogenase transcript, and the percentage of luciferase mRNA in cytoplasm was calculated.

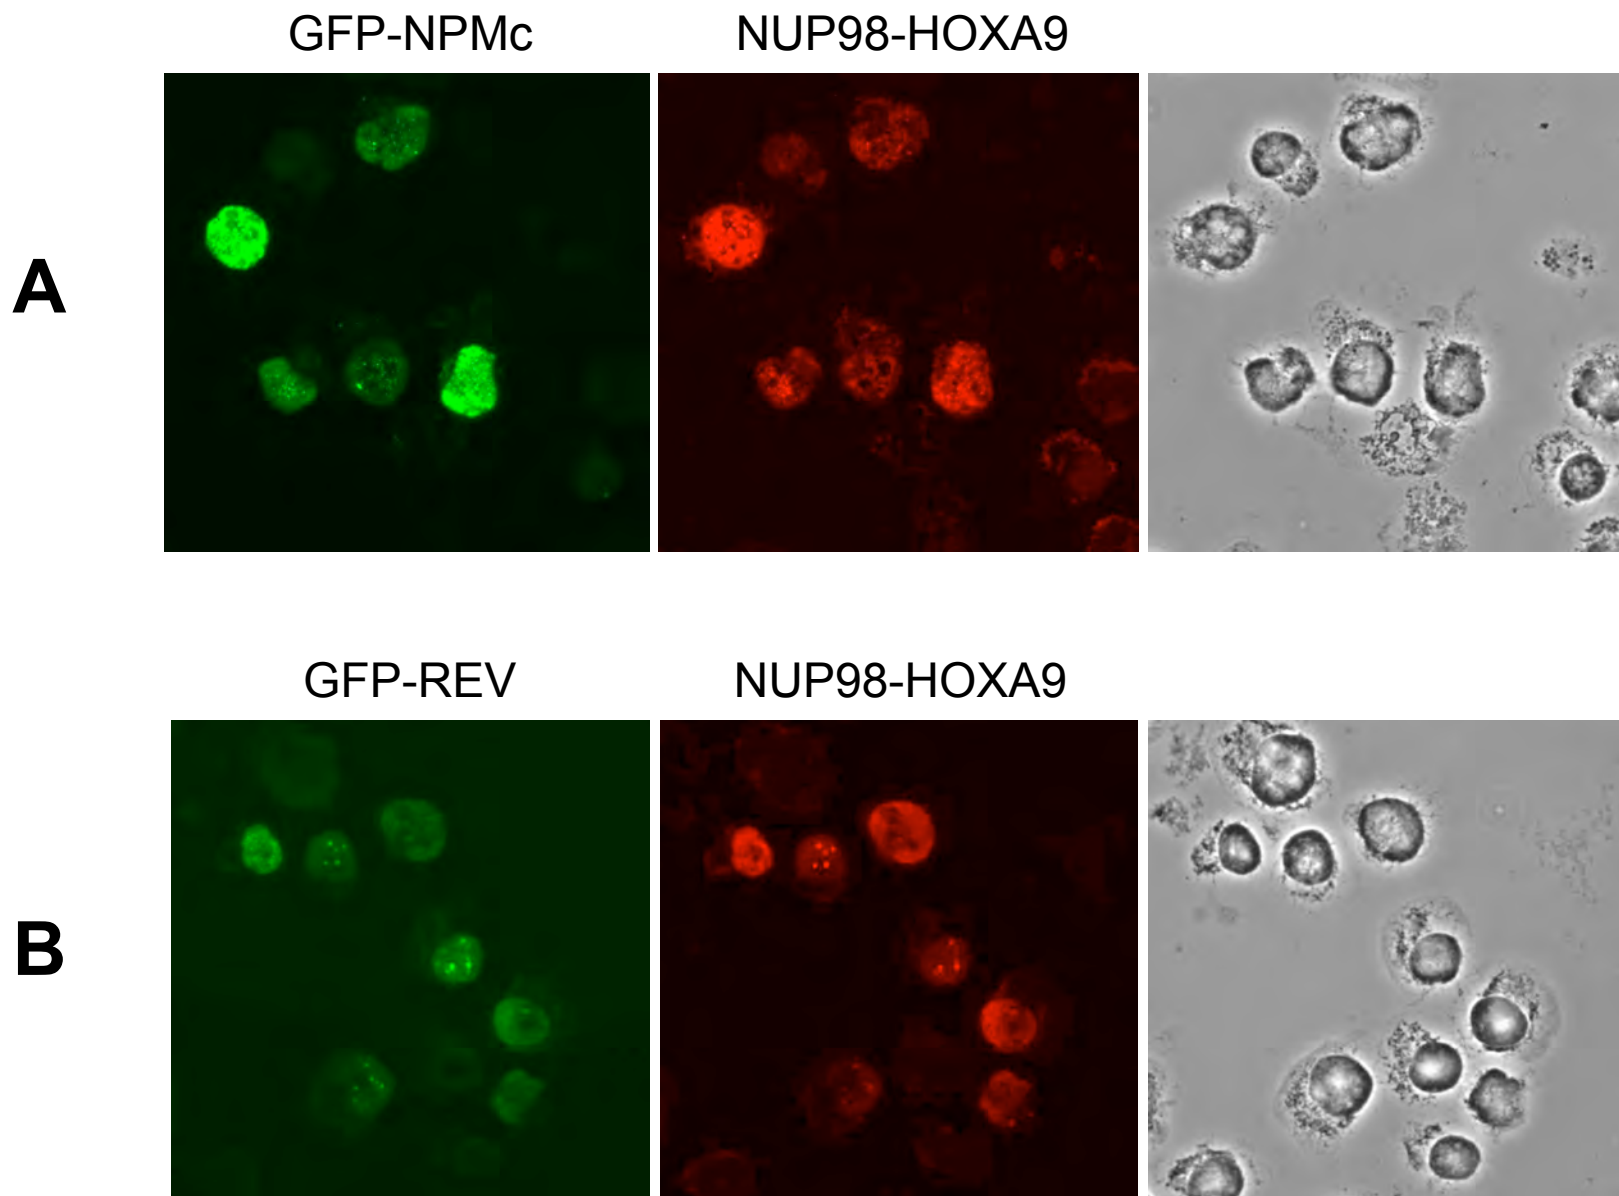

Supplementary Fig. 1

**A****NUP98-HOXA9**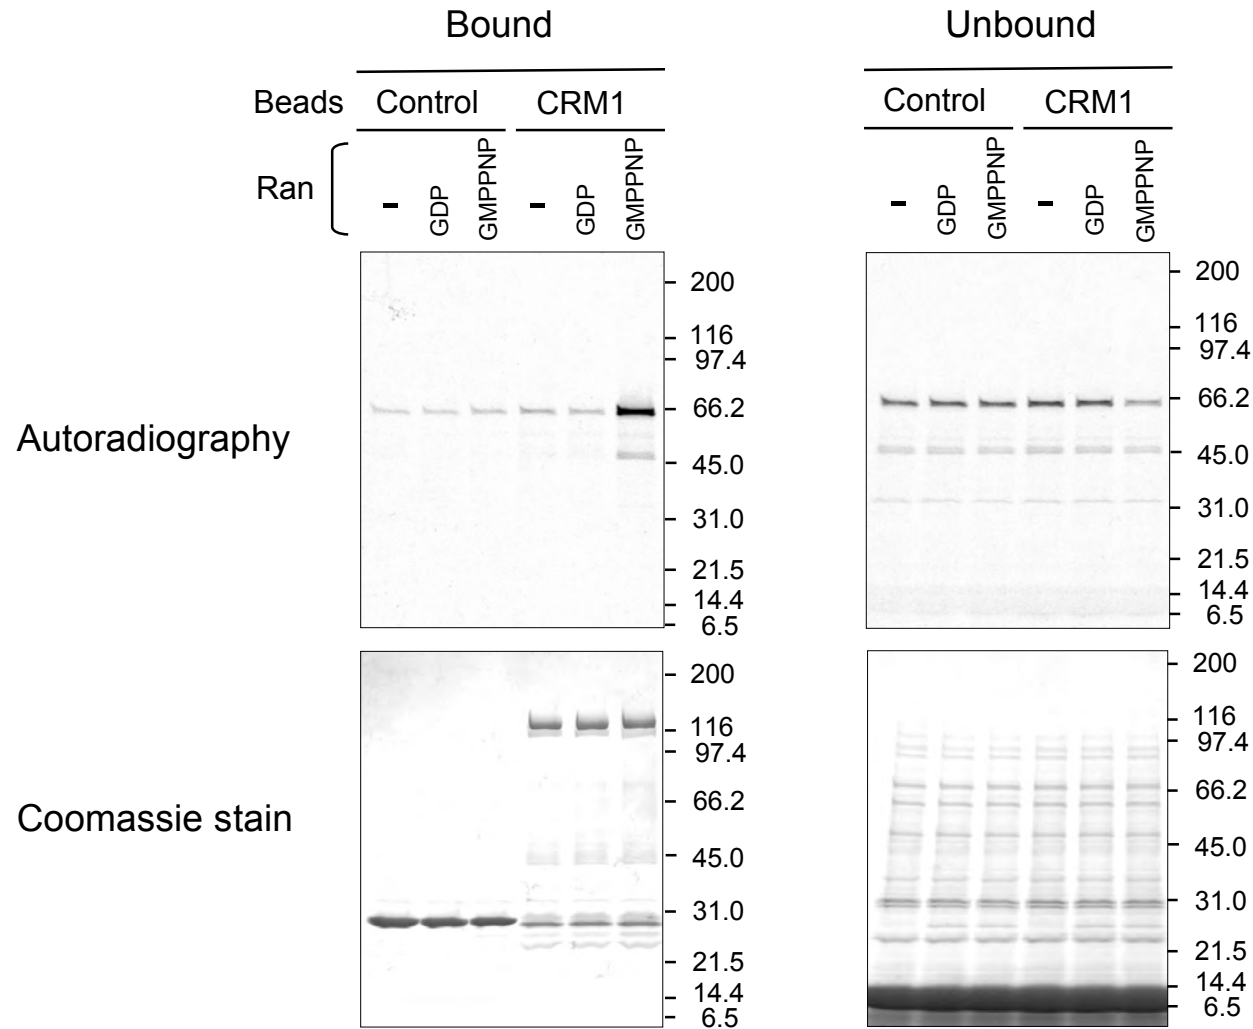

Supplementary Fig. 2A

**B****NUP98-HOXA9  $\Delta$ N**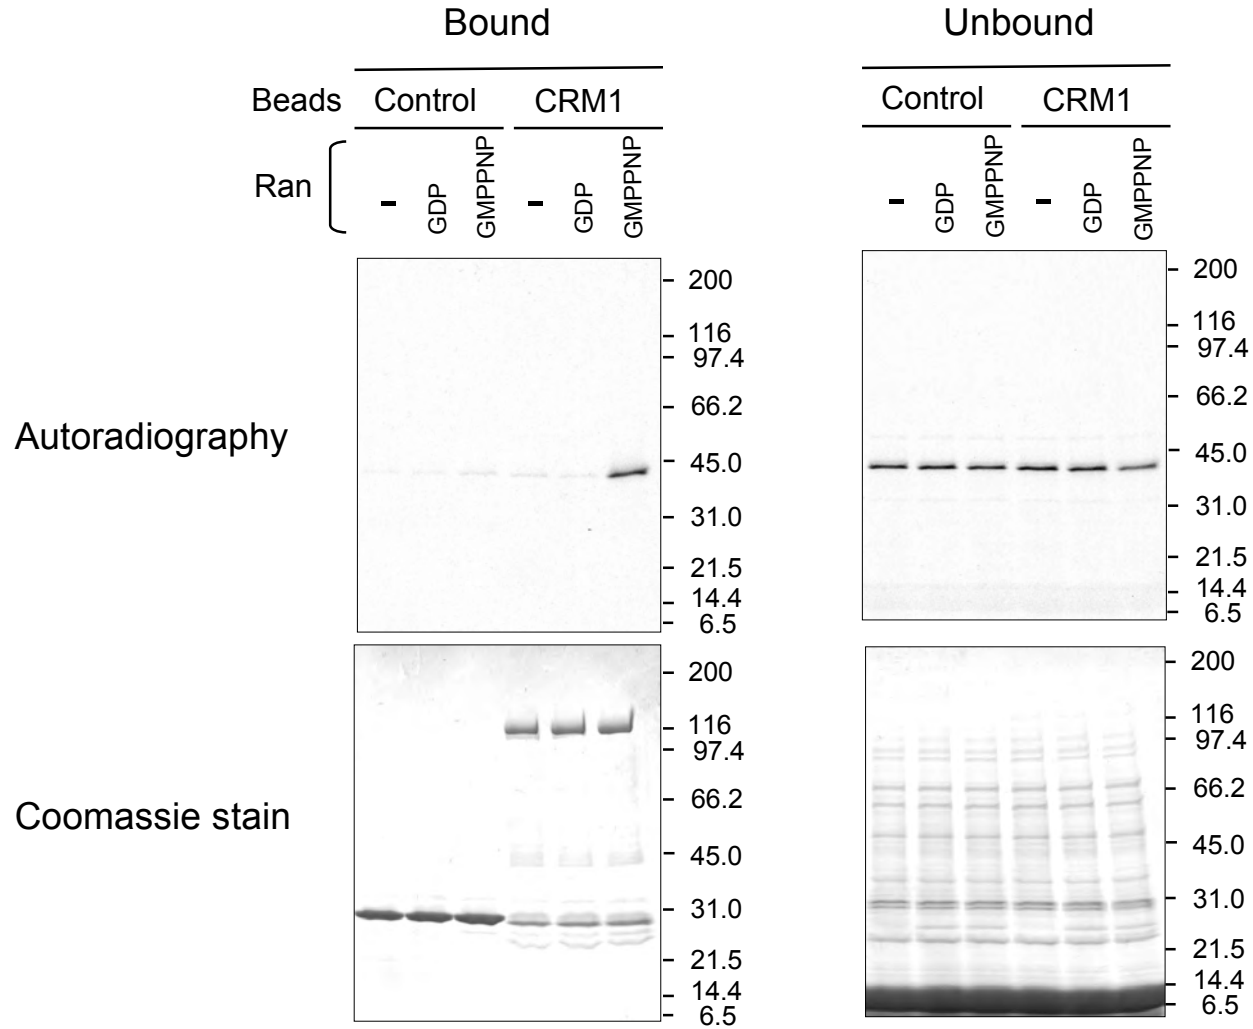

Supplementary Fig. 2B

**C****NUP98-HOXA9  $\Delta$ M**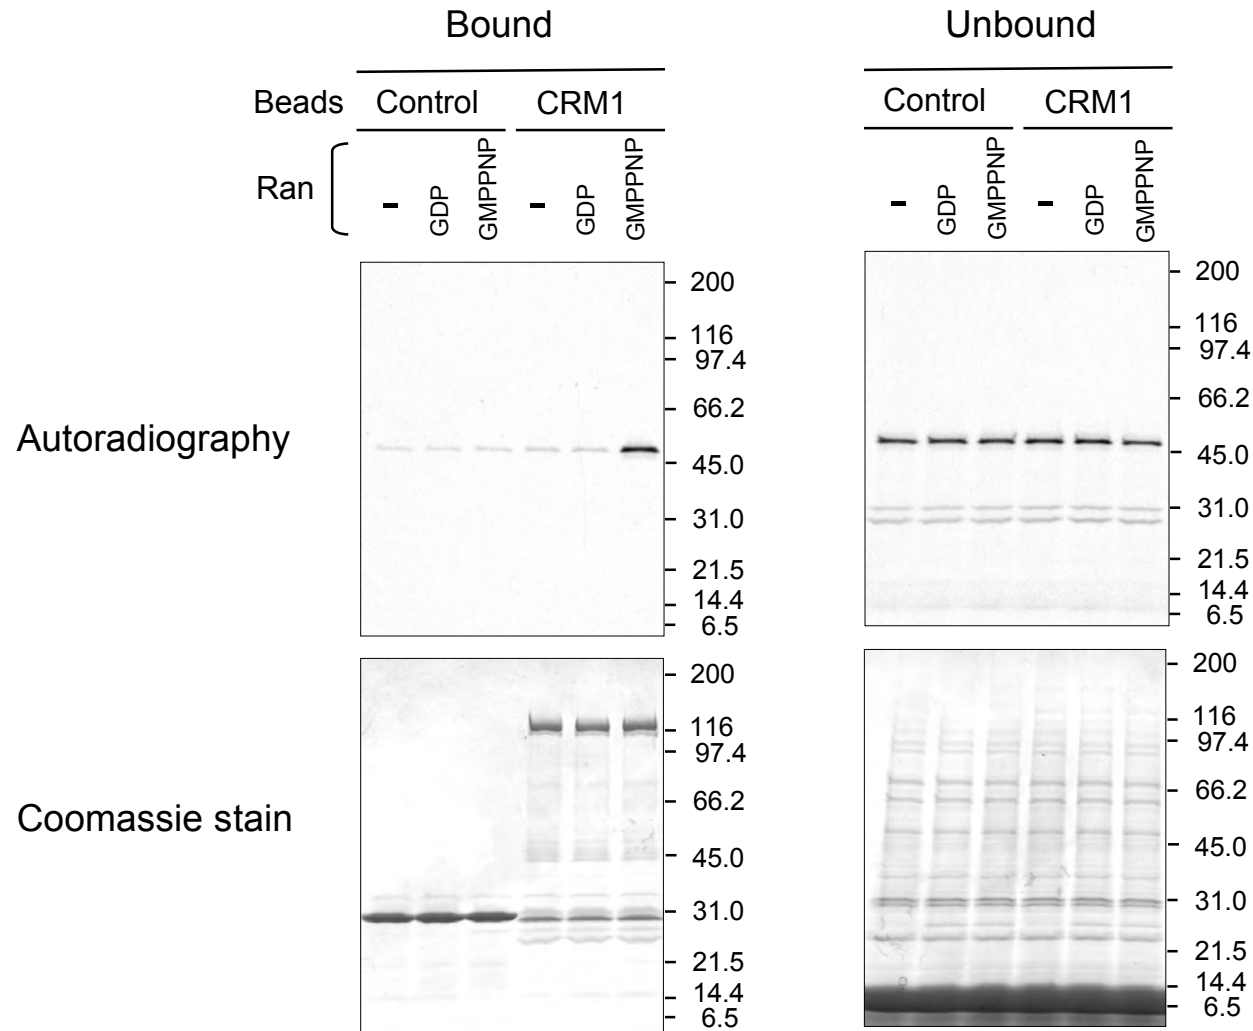

Supplementary Fig. 2C

**D****NUP98-HOXA9  $\Delta$ J**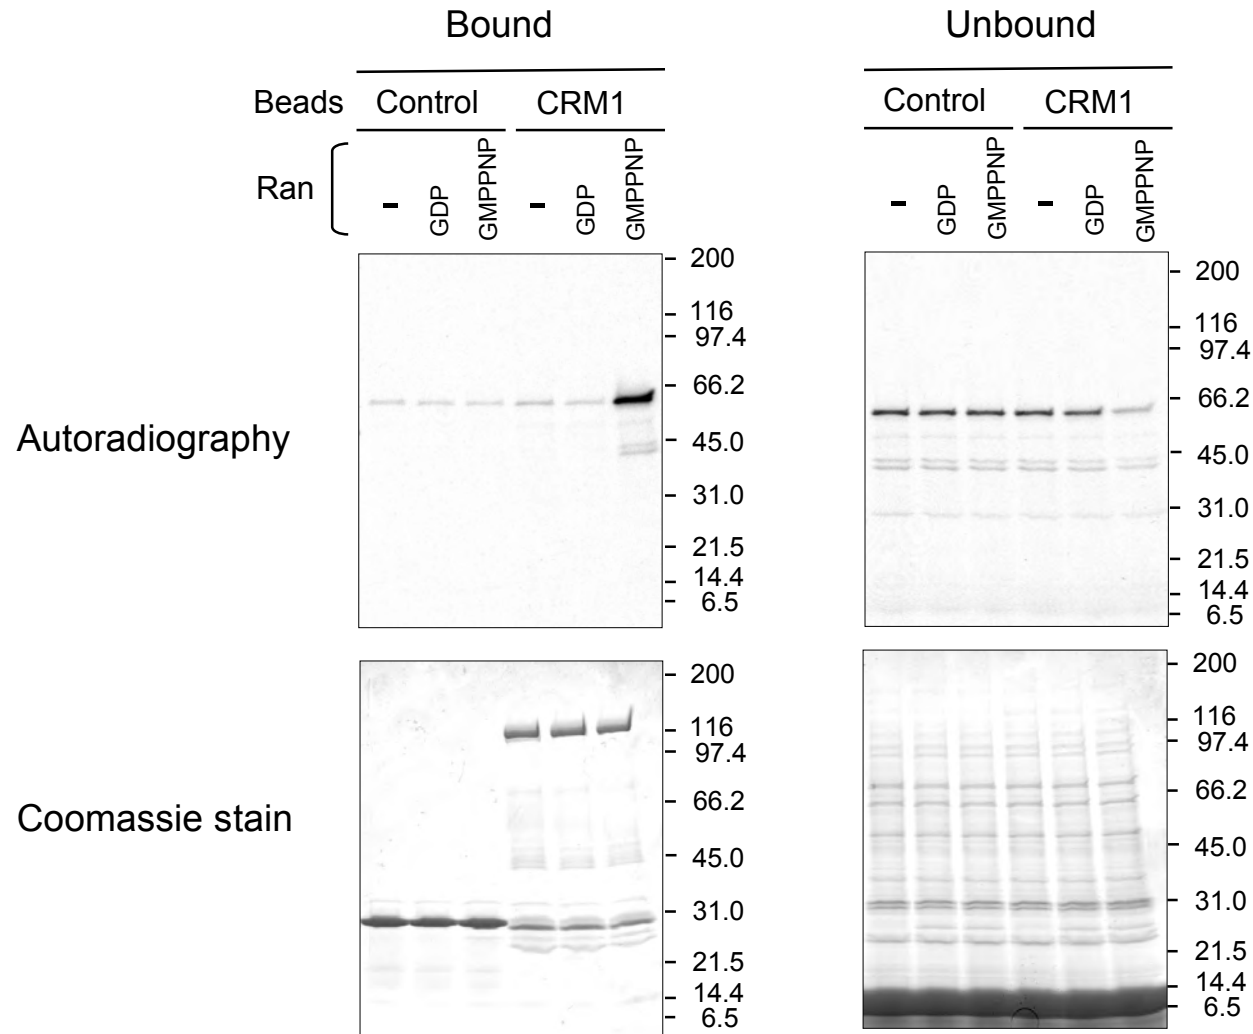

Supplementary Fig. 2D

**E****NUP98-HOXA9  $\Delta$ NUP**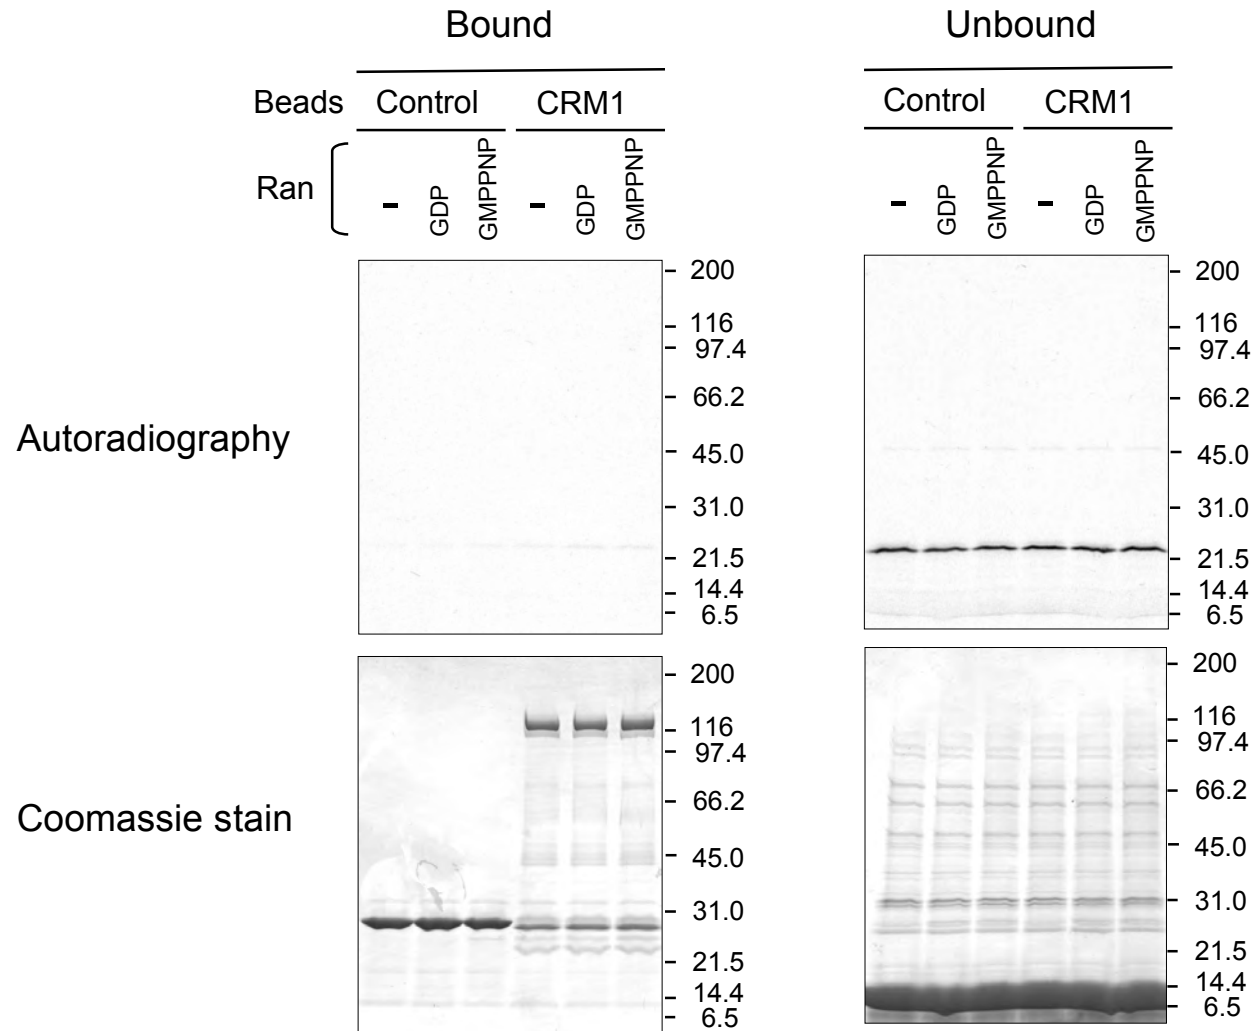

Supplementary Fig. 2E

**F****NUP98**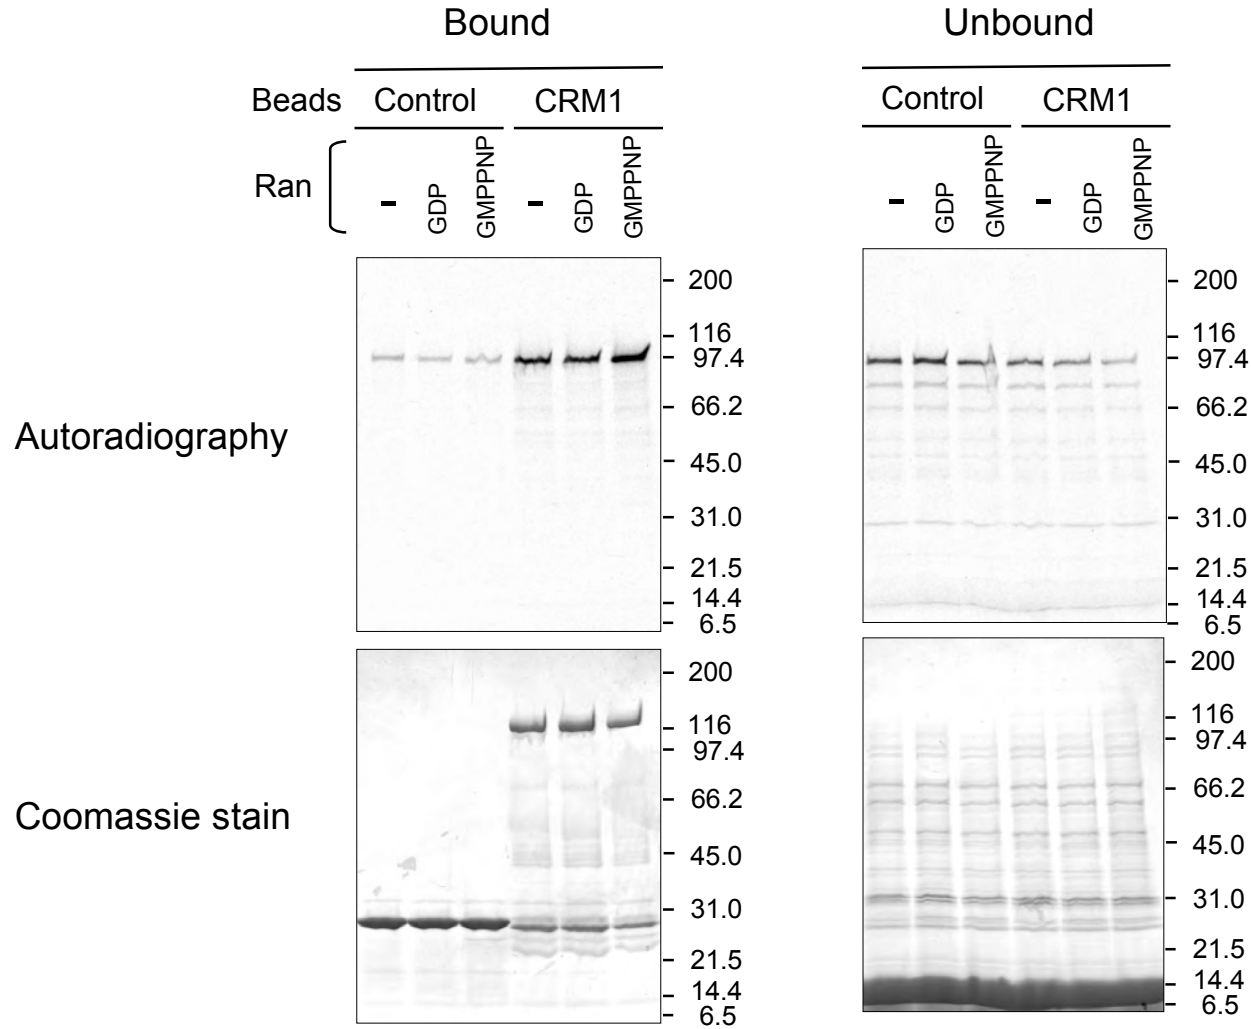

Supplementary Fig. 2F



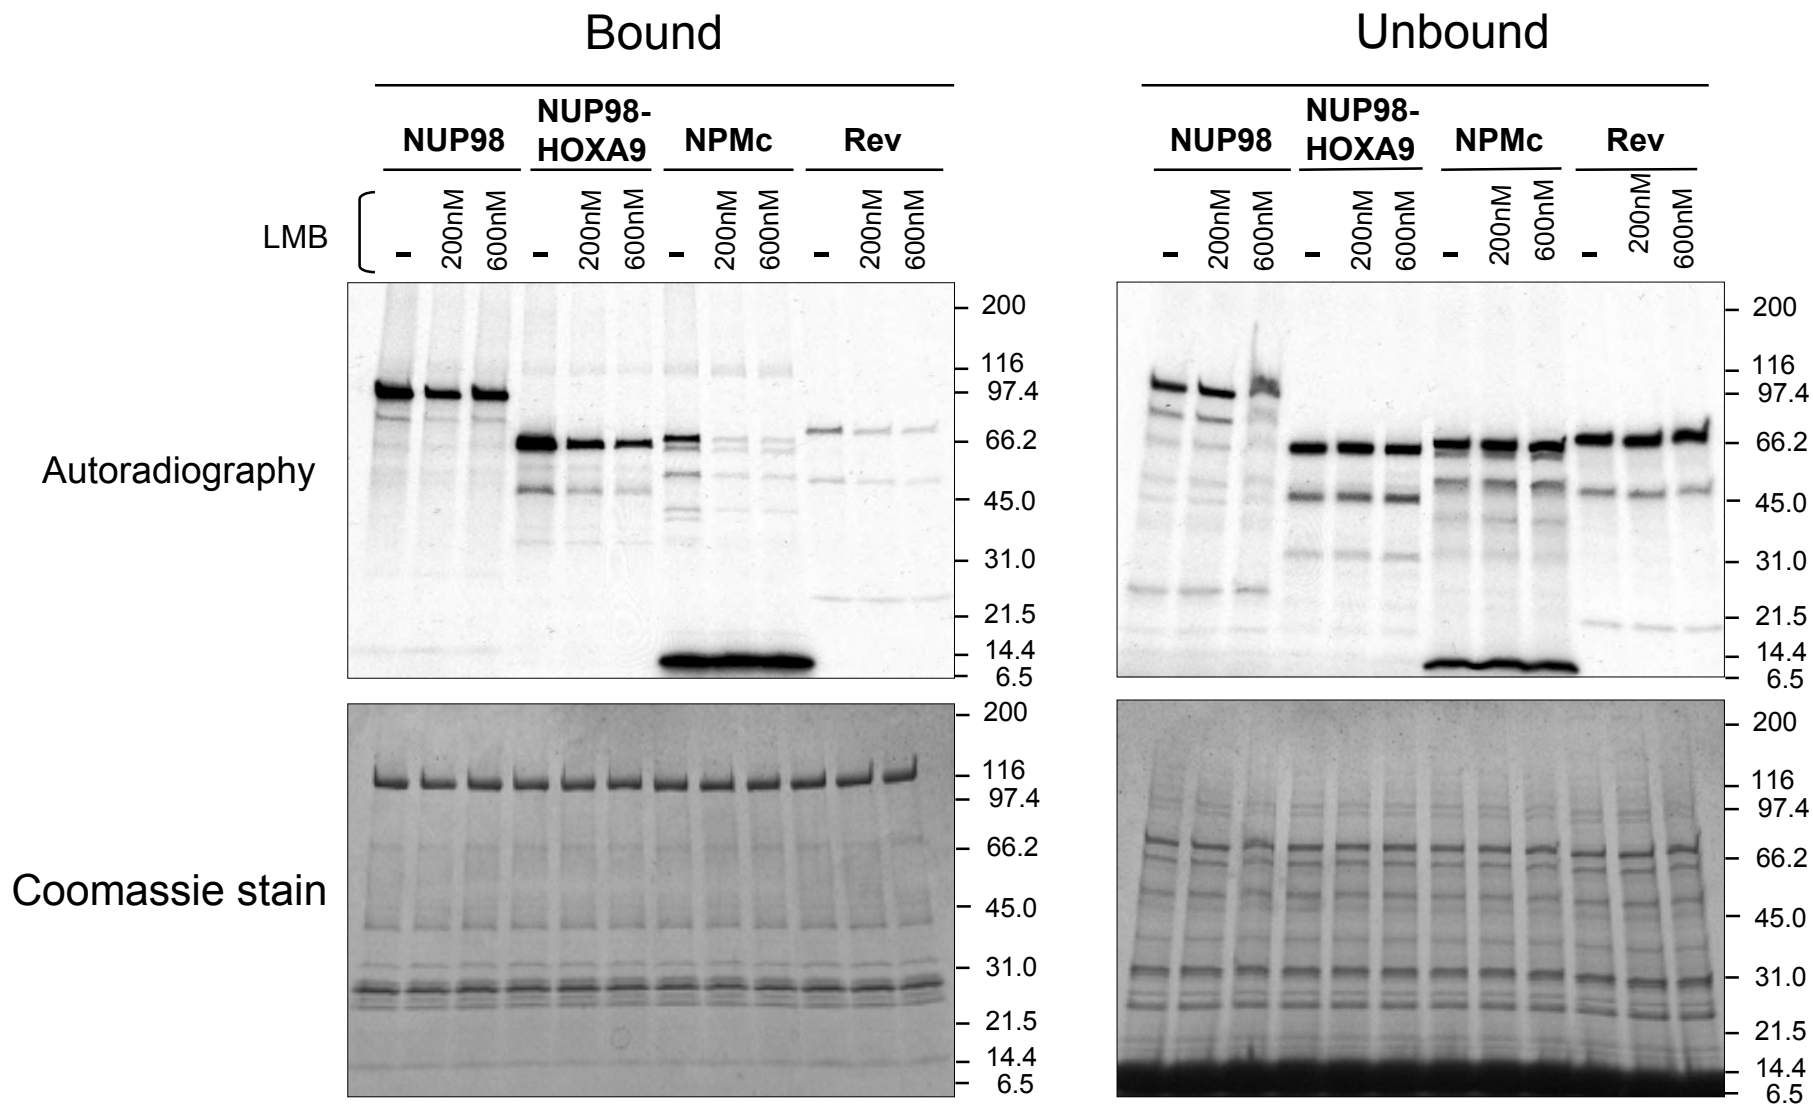

Supplementary Fig. 3

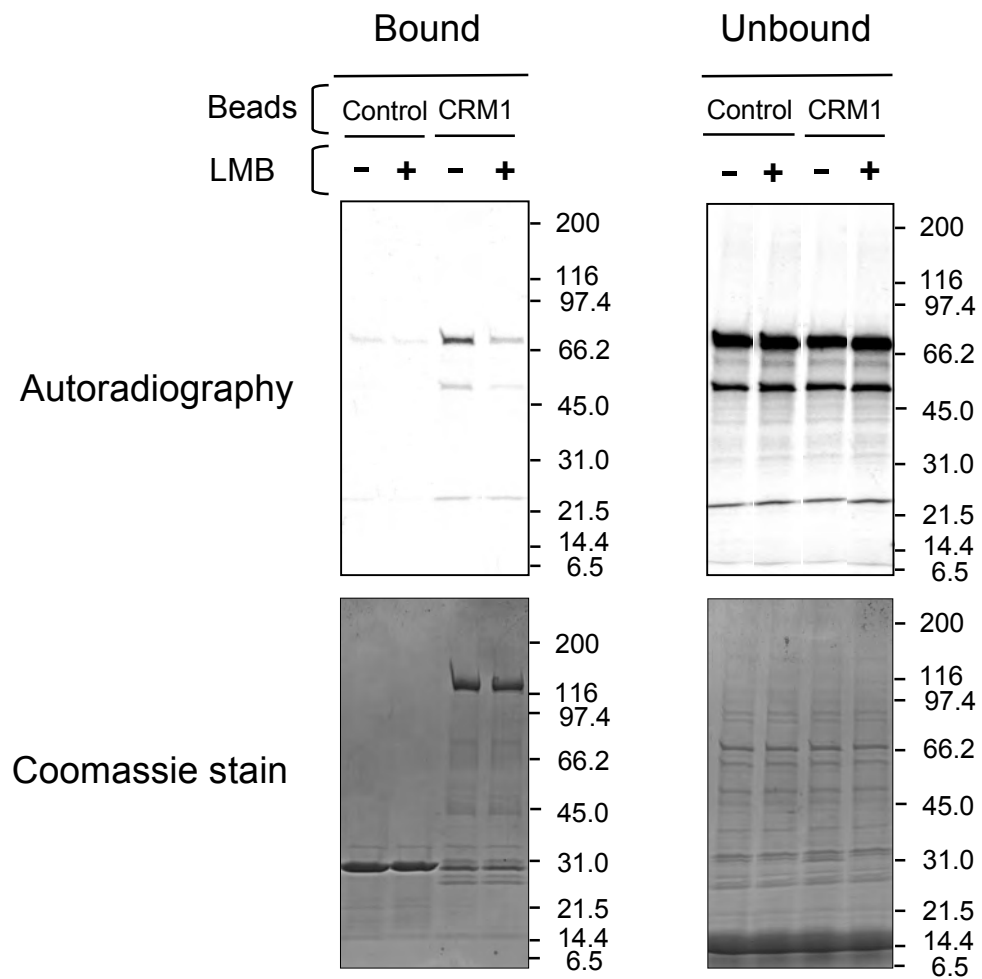

Supplementary Fig. 4



# NUP98-DDX10

## B

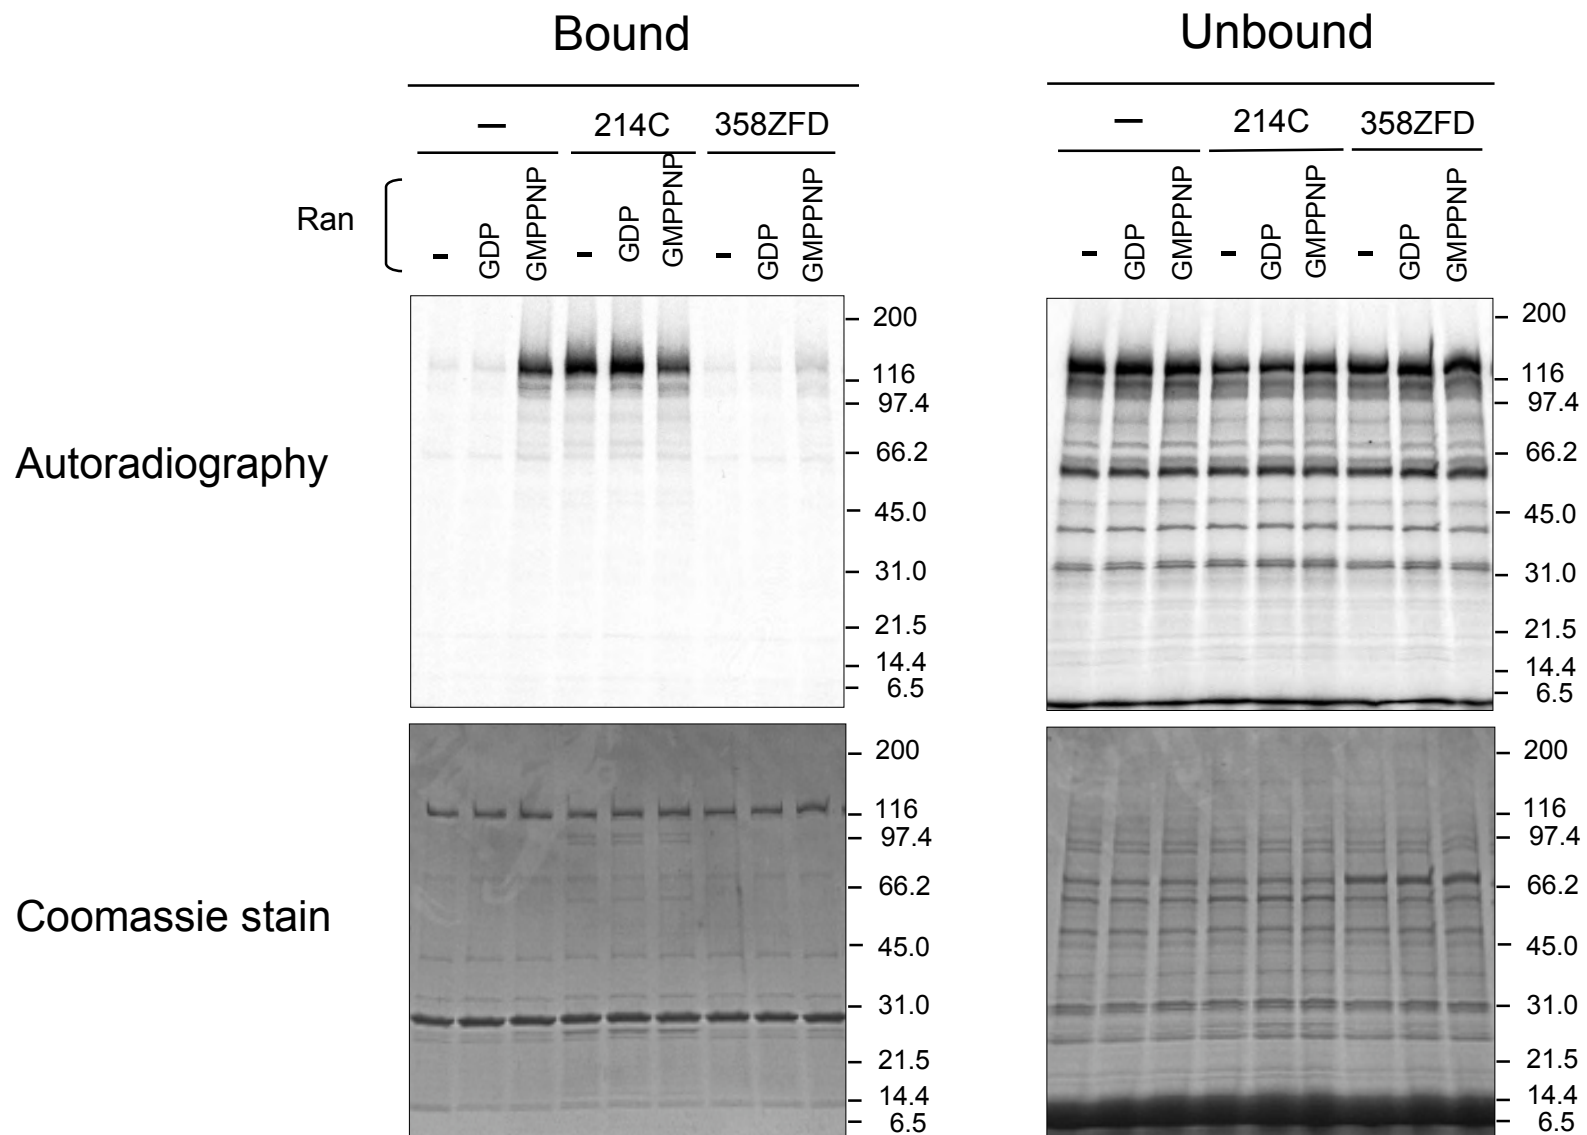

Supplementary Fig. 5B

**C****NUP98**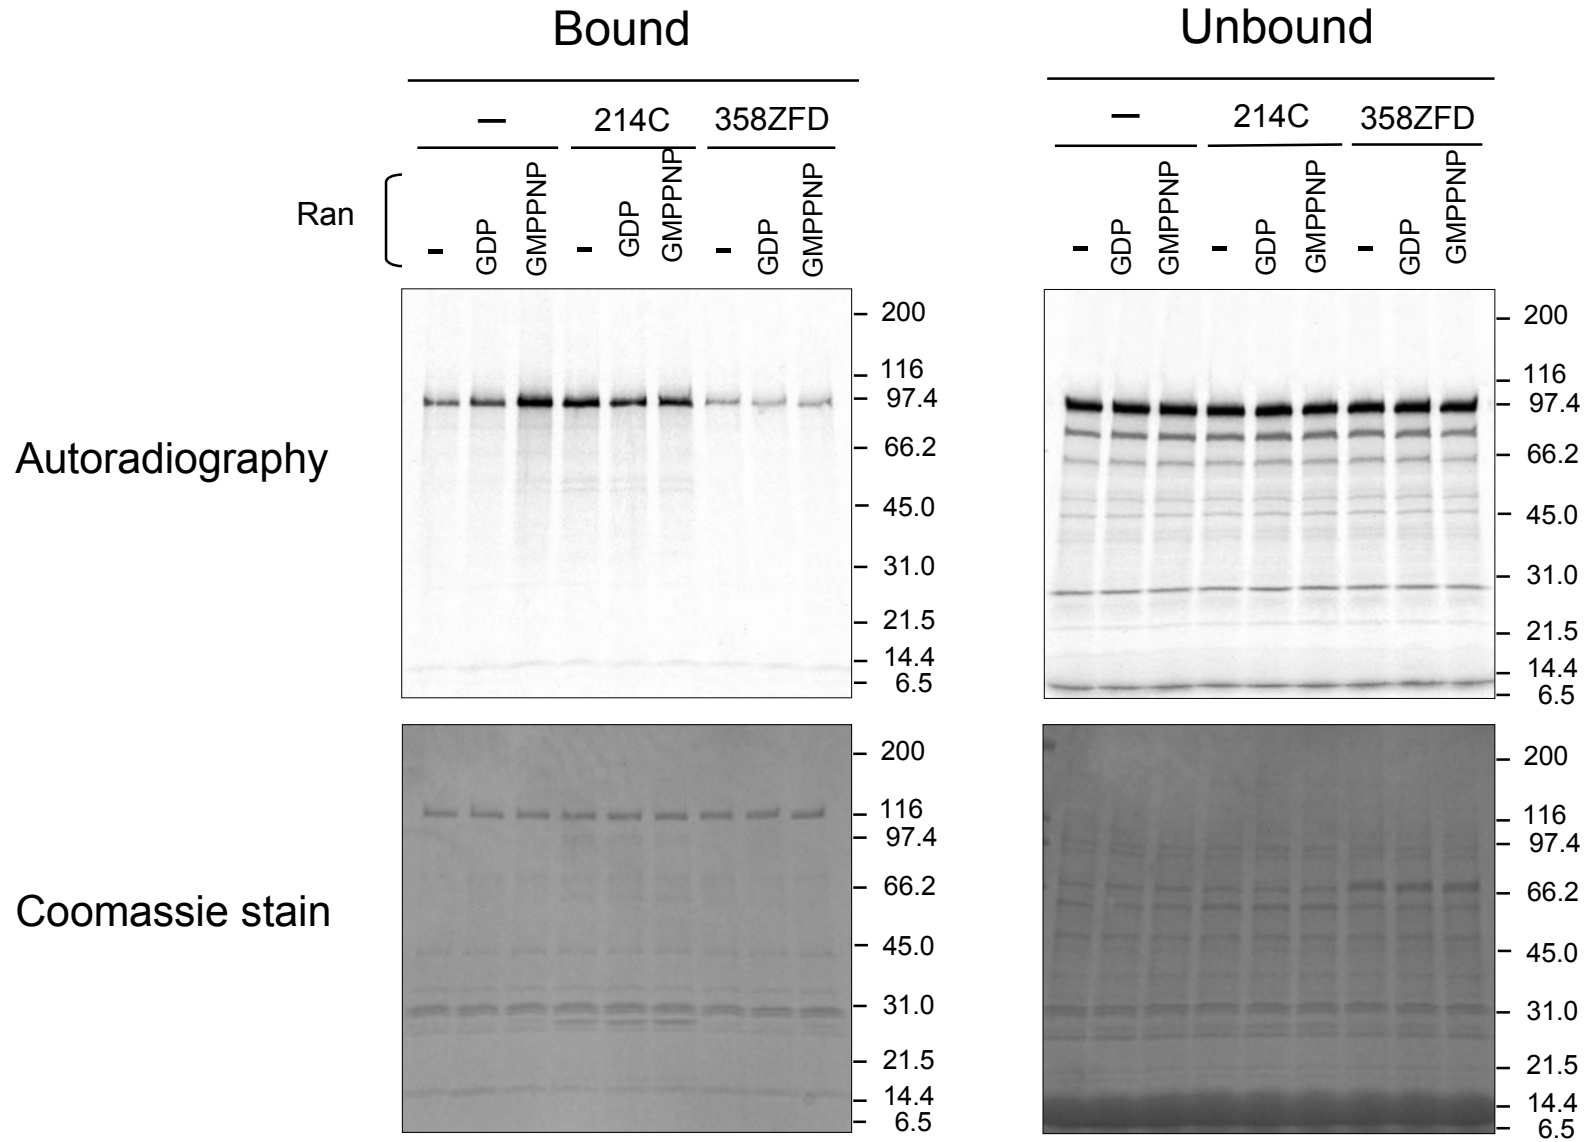

Supplementary Fig. 5C

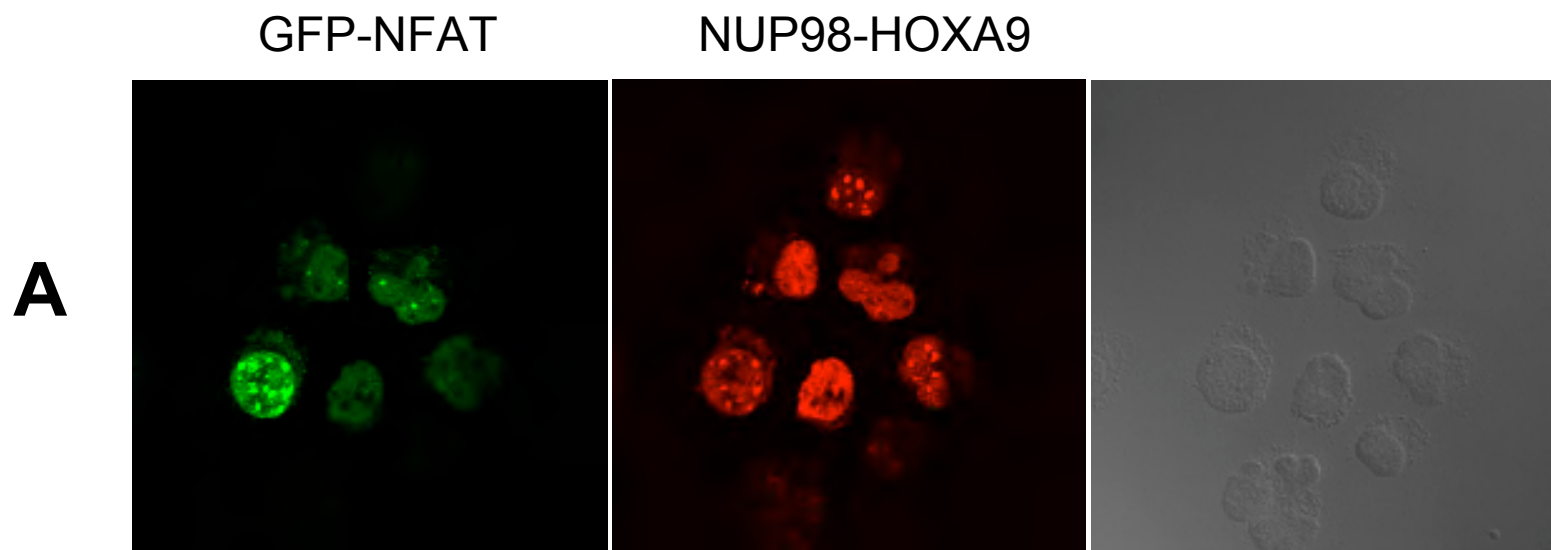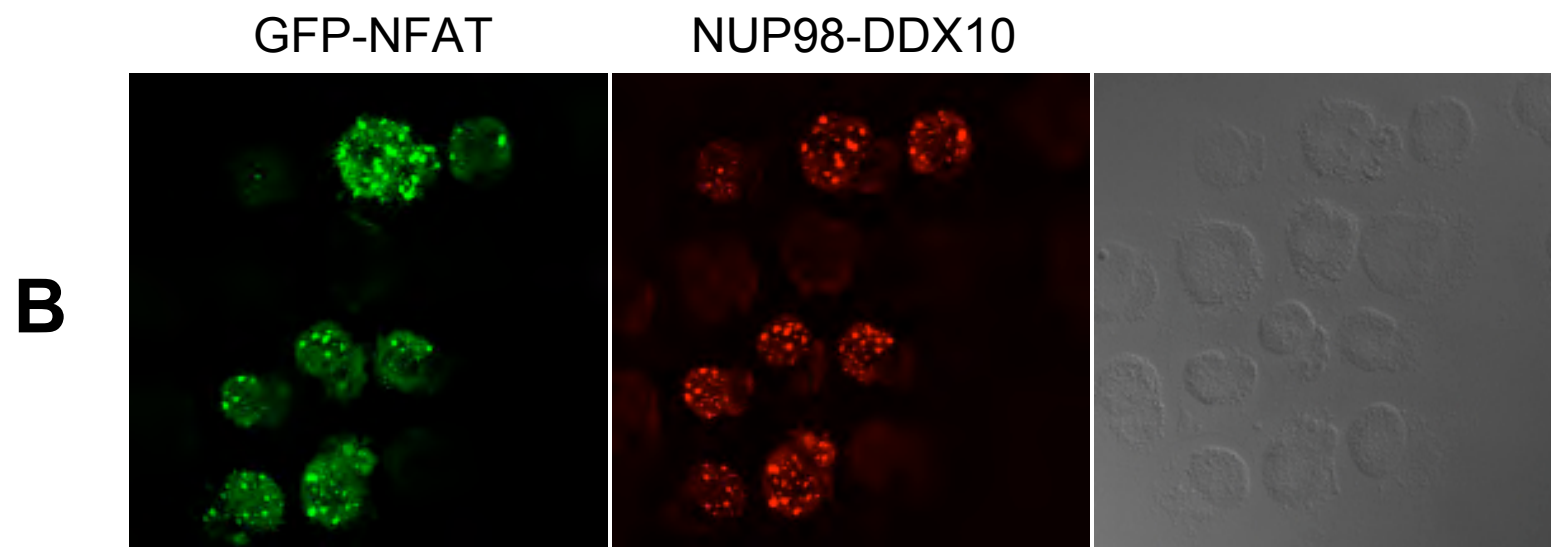

Supplementary Fig. 6AB

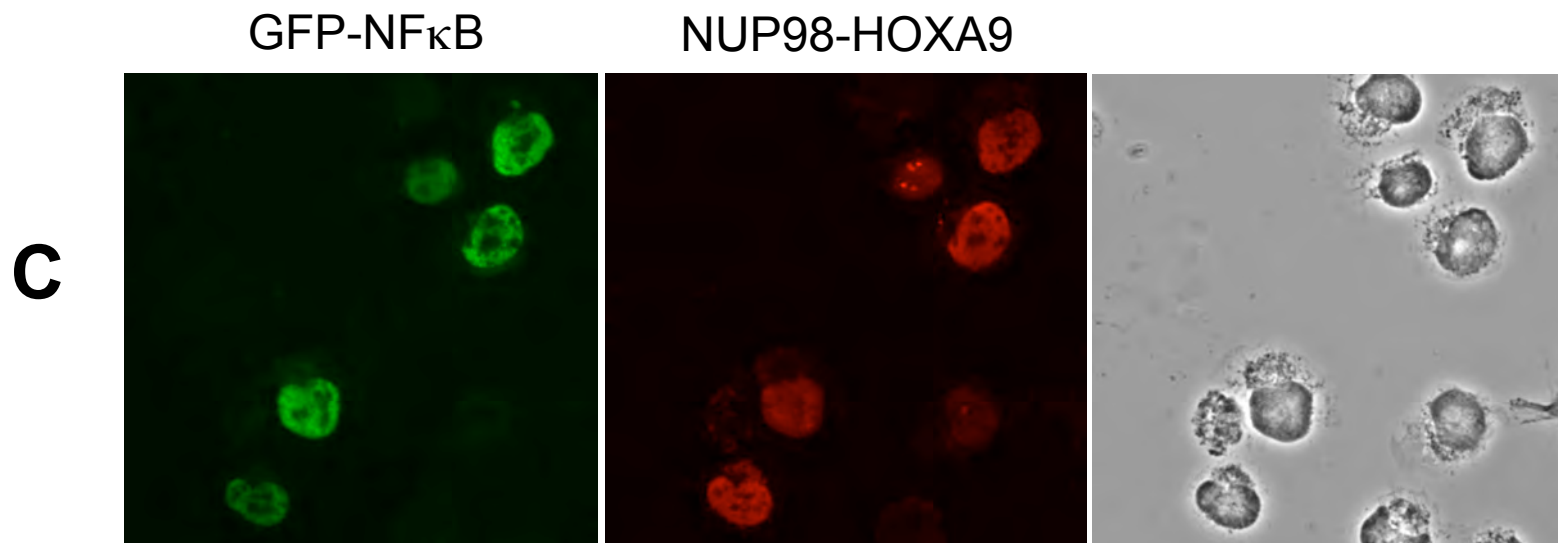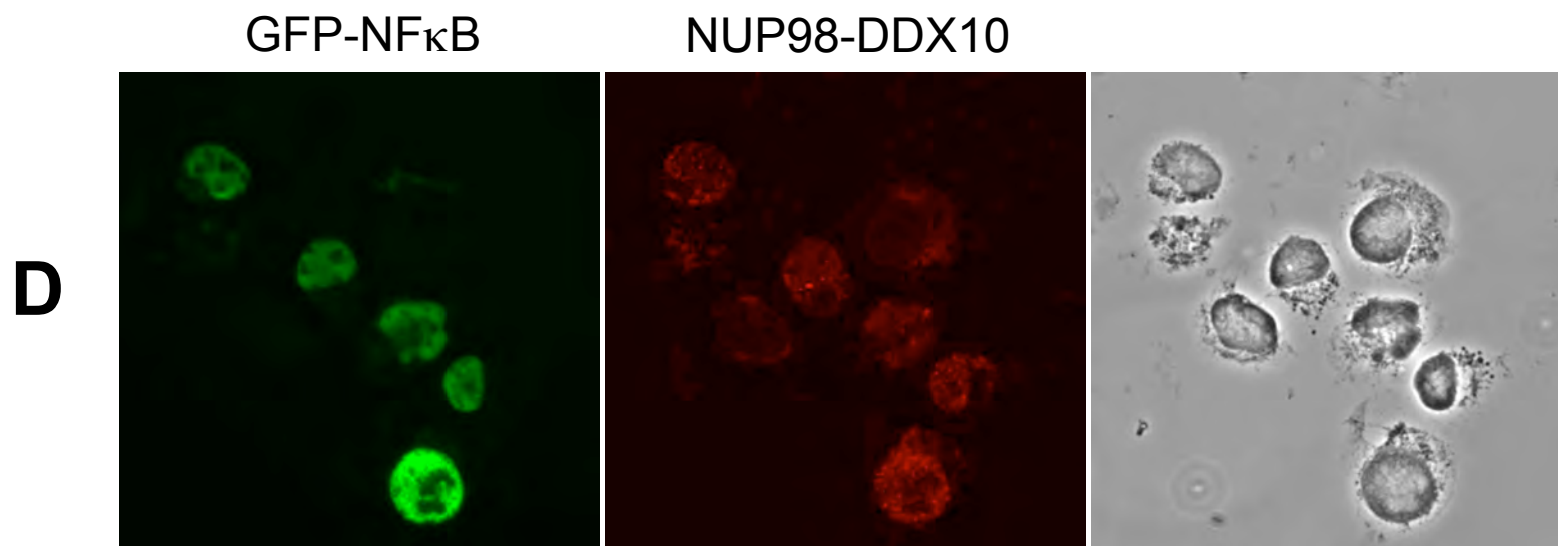

Supplementary Fig. 6CD

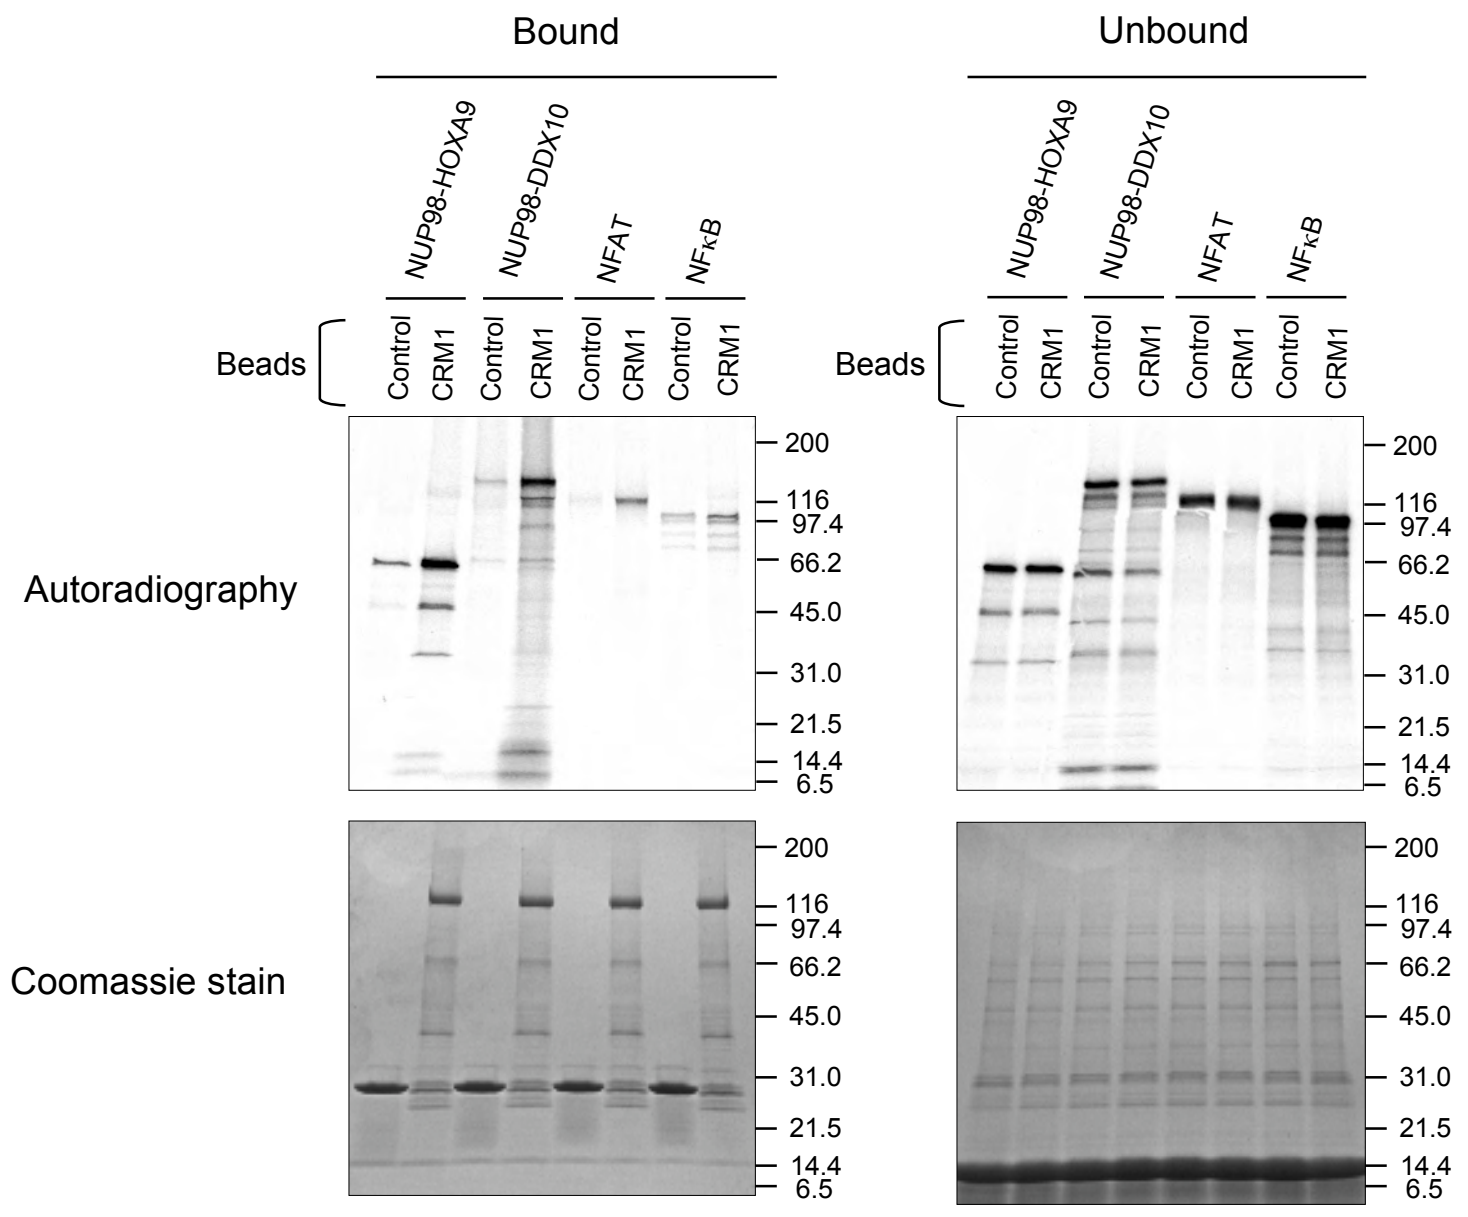

Supplementary Fig. 6E



Control Vector

NUP98-HOXA9

NUP98-DDX10

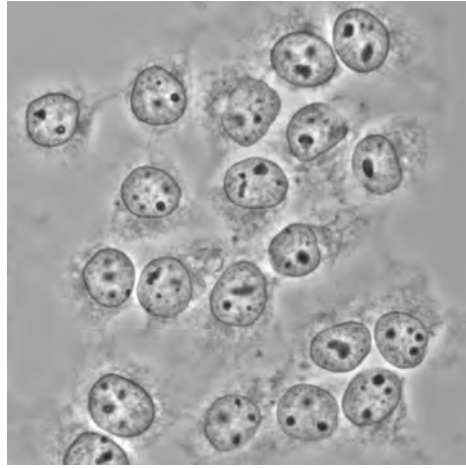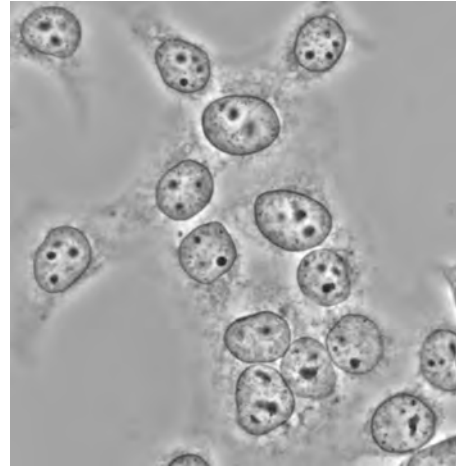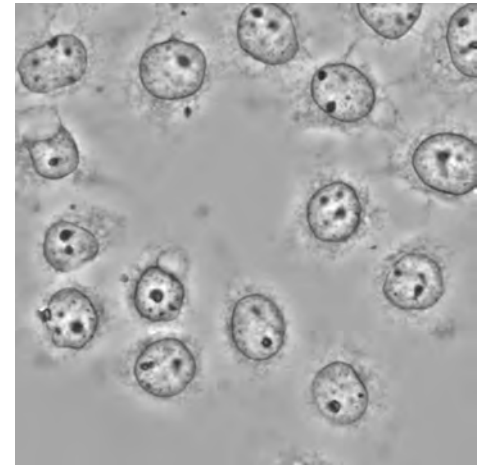

TRITC-BSA

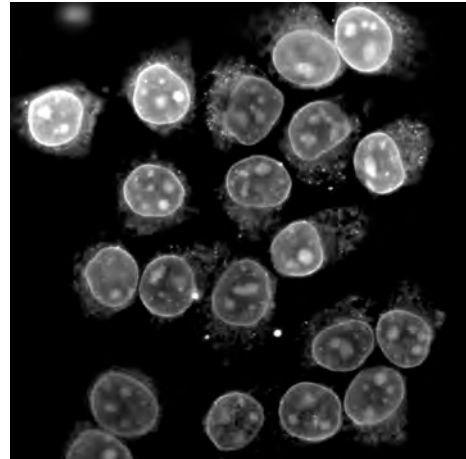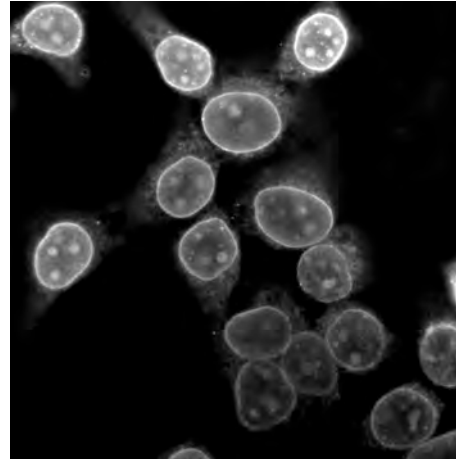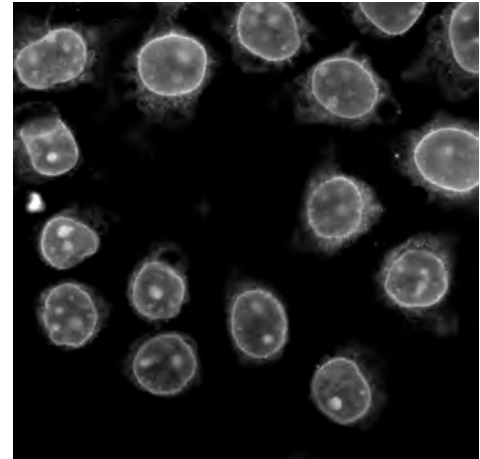

Average Intranuclear  
Fluorescence

$214 \pm 125$

$154 \pm 66.2$

$177 \pm 56.9$

Supplementary Fig. 7

## Supplementary Figure Legends

Supplementary Figure 1. **NUP98-HOXA9 is expressed in cells that show nuclear retention of CRM-1 export substrates.** K562 cells were nucleofected with EGFP-NPMc (A) or GFP-Rev (B) along with vector expressing NUP98-HOXA9. Cells were immunostained with anti-HA antibody in combination with Alexa Fluor 647-conjugated secondary antibody. The left panels show GFP images, the middle panels show anti-HA stains, and the right panels show corresponding phase contrast images. Images were viewed using a Nikon Eclipse 80i microscope with a Nikon 40X, 0.75 numerical aperture CFI Plan Fluor DLL objective and were acquired with a Nikon Coolsnap ES camera using MetaMorph 6.3r2 software.

Supplementary Figure 2. **NUP98-HOXA9 binds CRM1 through the FG motif in a Ran-GTP-dependent manner.** <sup>35</sup>S-labeled NUP98-HOXA9 and its variants were incubated with GST (Control) or GST-CRM1 (CRM1) immobilized on glutathione Sepharose 4B beads in the presence or absence of RanGDP or the RanGTP analog, RanGMPPNP. Uncropped autoradiographs and Coomassie-stained gels of bound and unbound fractions of reactions containing NUP98-HOXA9 (A), NUP98-HOXA9ΔN (B), NUP98-HOXA9ΔM (C), NUP98-HOXA9ΔJ (D), NUP98-HOXA9ΔNUP (E), and NUP98 (F) are shown. The positions of molecular mass markers (expressed in kilodaltons) are shown. Corresponding cropped autoradiographs are shown in Figure 2B.

Supplementary Figure 3. **NUP98-HOXA9 binding to CRM1 is stronger than that of CRM1 export substrates.** <sup>35</sup>S-labeled NUP98-HOXA9, NUP98, NPMc, and Rev were incubated with GST-CRM1 immobilized on glutathione Sepharose 4B beads in the presence of RanGMPPNP with or without the indicated amount of Leptomycin B (LMB). Uncropped autoradiographs and Coomassie-stained gels are shown. The positions of molecular mass markers (expressed in kilodaltons) are shown. Corresponding cropped autoradiographs are shown in Figure 2D.

Supplementary Figure 4. **Rev binds specifically to CRM1.** <sup>35</sup>S-labeled Rev was incubated with GST (Control) or GST-CRM1 (CRM1) immobilized on glutathione Sepharose 4B beads in the presence of RanGMPPNP with or without 2 μM Leptomycin B (LMB). Approximately 30% of the total bound material and 10% of total unbound material for each reaction were analyzed as shown. Autoradiographs and Coomassie-stained gels are shown. The positions of molecular mass markers (expressed in kilodaltons) are shown.

Supplementary Figure 5. **NUP98 fusion proteins and NUP98 interact differently with NUP214.** <sup>35</sup>S-labeled NUP98-HOXA9, NUP98-DDX10, and NUP98 were incubated with GST-CRM1 immobilized on glutathione Sepharose 4B beads in the presence or absence of RanGDP or RanGMPPNP, with or without NUP214C or NUP358ZFD proteins as indicated. Uncropped autoradiographs and Coomassie-stained gels of bound and unbound fractions of reactions containing NUP98-HOXA9 (A), NUP98-DDX10 (B), and NUP98 (C) are shown. The positions of molecular mass markers (expressed in kilodaltons) are shown. Corresponding cropped autoradiographs are shown in Figure 4.

Supplementary Figure 6. **NUP98 fusions are expressed in cells that show nuclear retention of NFAT and NFκB.** K562 cells were nucleofected with GFP-NFAT (A and C) or EGFP-NFκB(p65) (B and D) along with vector expressing NUP98-HOXA9 (A and B) or NUP98-DDX10 (C and D). Cells were immunostained with anti-HA antibody in combination with Alexa Fluor 647-conjugated secondary antibody. The left panels show GFP images, the middle panels show anti-HA stains, and the right panels show corresponding DIC or phase contrast images. The images in A and B were acquired with a Zeiss LSM510 Meta laser scanning confocal microscope equipped with a Zeiss 63X, 1.4 numerical aperture Plan Apochromat oil objective using Zeiss LSM510 software. Images in C and D were viewed using a

Nikon Eclipse 80i microscope with a Nikon 40X, 0.75 numerical aperture CFI Plan Fluor DLL objective and were acquired with a Nikon Coolsnap ES camera using MetaMorph 6.3r2 software.

Supplementary Figure 7. **NUP98 fusions do not enhance nuclear import.** HeLa cells were retrovirally transduced with control vector or vector expressing NUP98-HOXA9 or NUP98-DDX10 and grown on cover slips. Cells were permeabilized with 35  $\mu\text{g/ml}$  digitonin in transport buffer (20 mM HEPES-KOH, pH 7.3, 110 mM potassium acetate and 2 mM magnesium acetate). Import assays were carried out essentially as described (1,2) using a fluorescent import substrate (TRITC-BSA; 0.4  $\mu\text{g/ml}$ ) in the presence of RanGDP (0.6  $\mu\text{g/ml}$ ), karyopherin  $\alpha 1$  (1  $\mu\text{g/ml}$ ) and  $\beta 1$  (0.5  $\mu\text{g/ml}$ ), and an energy-regenerating system. The lower panels show fluorescent images and the upper panels show corresponding phase contrast images. Images were viewed using a Nikon Eclipse 80i microscope with a Nikon 40X, 0.75 numerical aperture CFI Plan Fluor DLL objective and were acquired with a Nikon Coolsnap ES camera using MetaMorph 6.3r2 software. The intranuclear fluorescence intensity of 100 cells from each sample was measured using MetaMorph 6.3r2 software; the average intranuclear fluorescence intensity and standard deviation are shown.

1. Moore, M. S., and Blobel, G. (1992) *Cell* **69**, 939-950
2. Zhong, H., Takeda, A., Nazari, R., Shio, H., Blobel, G., and Yaseen, N. R. (2005) *J. Biol. Chem.* **280**, 10675-10682
